# Supplementary material for: Urea-induced ROS generation causes insulin resistance in mice with chronic renal failure
Source: JCI journal article supplement (doi:10.1172/jci37672), 2009-12-08
Supplement: sd1 [file 1]

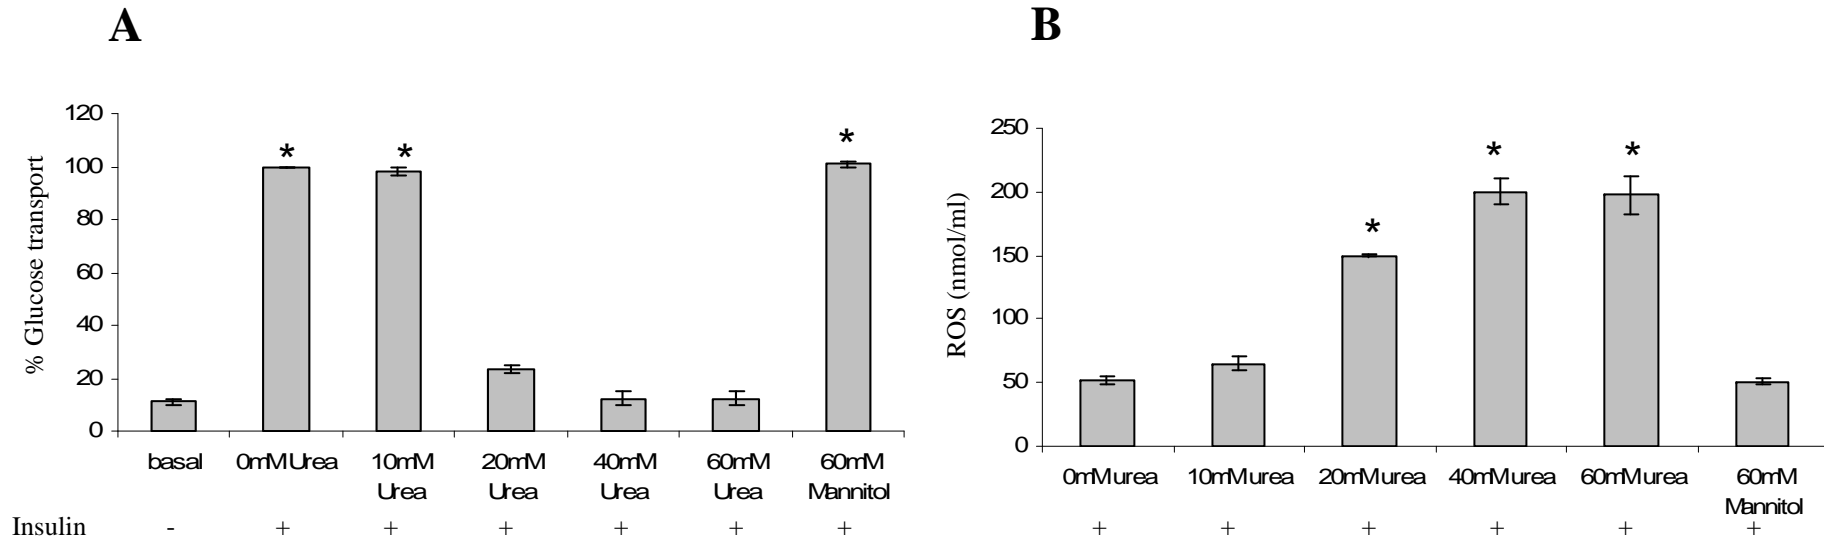

**Dose-response effect of Urea on differentiated 3T3L1 cells.** The cells were incubated with different urea concentrations for 72 hours. **(A)** Insulin stimulated glucose uptake were determined. **(B)** Intracellular ROS generation were measured with DCF. Mannitol, was used as an osmotic control for the higher urea concentration Each bar represents the mean $\pm$ SEM of 5 separate experiments, each with n = 8. \*P < 0.01 compared respectively with cells not treated with insulin (A), or with urea (B).

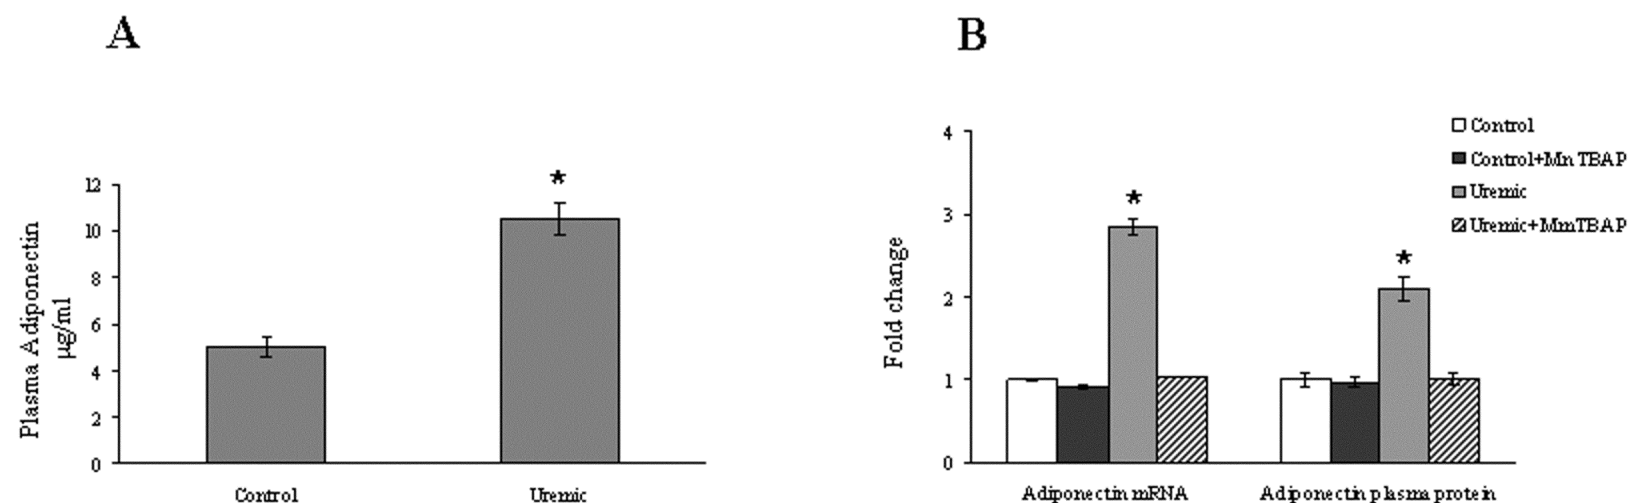

**Uremic mice have elevated plasma levels of adiponectin that were completely reversed by treatment with MnTBAP.** (A) Plasma adiponectin concentrations were measured in the plasma of controls and uremic mice by ELISA. Each bar represents the mean  $\pm$  SEM of 9 mice per group. \* $P < 0.01$  compared with controls. (B) Treated uremic mice and treated controls received MnTBAP i.p. for two weeks. Relative expression of adiponectin in epididymal adipose tissue of untreated and MnTBAP treated control and uremic mice measured by qPCR. (The control values are shown as 1). Plasma levels of adiponectin measured in the plasma of the untreated and MnTBAP treated control mice and in the plasma of untreated and MnTBAP treated CRF mice by ELISA. Each bar represents the mean  $\pm$  SEM of 7 mice per group. \* $P < 0.01$  compared with controls.
